# Supplementary material
Source: PubMed Central journal article supplement (PMC6812108)
Supplement: ao9b02236_si_001.pdf [file ao9b02236_si_001.pdf]

**1. Title:**

Resveratrol and curcumin improve intestinal mucosal integrity and decrease m<sup>6</sup>A RNA methylation in the intestine of weaning piglets.

**2. Authorship:**

Zhending Gan, Wenyao Wei, Jiamin Wu, Yongwei Zhao, Lili Zhang, Tian Wang, Xiang Zhong\*.

Nanjing Agricultural University, Nanjing, China. Weigang Road, Xuanwu District, Nanjing, China,

210000. 2017105067@njau.edu.cn (Z.G); [w\\_wenyao@163.com](mailto:w_wenyao@163.com) (W.W); 2018105066@njau.edu.cn

(J.W); [yanninuist@163.com](mailto:yanninuist@163.com) (Y.Z.); [zhanglili@njau.edu.cn](mailto:zhanglili@njau.edu.cn) (LZ); [tianwangnjau@163.com](mailto:tianwangnjau@163.com) (TW)

---

**Supporting information**
**Table S1.** Composition and nutrient levels of the basal diet
 

---

| Ingredients                          | %    |
|--------------------------------------|------|
| Corn                                 | 65.8 |
| Soybean meal                         | 24   |
| Soybean oil                          | 2.5  |
| Fish meal                            | 1.5  |
| Limestone                            | 0.85 |
| CaHPO <sub>4</sub>                   | 1    |
| Salt                                 | 0.35 |
| Premix <sup>a</sup>                  | 4    |
| Nutrient                             |      |
| Digestive energy(MJ/kg) <sup>b</sup> | 1525 |
| Protein (%) <sup>b</sup>             | 18.5 |
| Calcium (%) <sup>b</sup>             | 0.70 |
| Phosphorus (%) <sup>b</sup>          | 0.55 |
| Lysine (%) <sup>b</sup>              | 1.32 |
| Crude fibre (%) <sup>b</sup>         | 3.25 |

---

<sup>a</sup> Supplied per kilogram of diet: vitamin A, 2200 IU; vitamin D-3,220 IU; vitamin E, 16 IU; vitamin K-3, 0.5 mg; biotin, 0.05 mg; folic acid, 0.3 mg; pantothenic acid, 10 mg; niacin, 15 mg; vitamin B2, 3.6 mg; vitamin B1, 1.0 mg; vitamin B6, 1.5 mg; Cu, 6 mg; Fe, 100 mg; Zn 110 mg; Mn, 4 mg; Se, 0.3 mg; I, 0.14 mg

<sup>b</sup> calculated value

**Table S2.** Primer sequence for qRT-PCR

| Primers        | Accession no.  | Sequence                   |                            |
|----------------|----------------|----------------------------|----------------------------|
|                |                | F                          | R                          |
| <i>β-ACTIN</i> | DQ845171.1     | CGG CAT CCA CGA AAC TAC CT | ACT CCT GCT TGC TGA TCC AC |
| <i>OCN</i>     | NM_001163647.2 | CCT CCT CCC CTT TCG GAC TA | ACG CCT CCA AGT TAC CAC TG |
| <i>ZO-1</i>    | AJ318101.1     | GCC GCC TCC TGA GTT TGA TA | CTA TGG AGC TCA ACA CCC CG |
| <i>CLDN1</i>   | NM_001244539.1 | ACA CCA CTT TGC AAG CAA CC | ACT GGG GTC ATG GGG TCA TA |
| <i>SOD1</i>    | NM_001190422.1 | GTA CCA GTG CAG GTC CTC AC | TCC CAA TTA CAC CAC AGG CC |
| <i>GPXI</i>    | NM214201 . 1   | TCG GTG TAT GCC TTC TCT GC | CAA ACT GGT TGC ACG GGA AG |
| <i>HO-1</i>    | NM_001004027.1 | ATG CCC TGG AGG AGG AGA TT | CAG GGC CTT CTG AGC AAT CT |
| <i>METTL3</i>  | XM_003128580.5 | TGA GGC TCC TGG AAG CAA AG | TCT GTC AGG GTC CCA TAG GG |
| <i>METTL14</i> | XM_003129231.6 | GTG GTT CTG GGG AGG GAT TG | GAA GTC CCC GTC TGT GCT AC |
| <i>FTO</i>     | KM232950.1     | CCC CAG AAA ATG CCG TAC CT | ACC AGG GGT CTC TAT GTC CC |
| <i>ALKBH5</i>  | XM_021067995.1 | CGT GTC CGT GTC CTT CTT CA | AGG ATG ATG ACA GCT CTG CG |
| <i>YTHDF2</i>  | XM_005665152.3 | CCA AGG GAT GGC AGC ACT AA | TTT GCC ACA GGA CCC TTG TT |

*β-ACTIN*, beta-actin; *OCN*, occludin; *ZO-1*, zonula occluden-1; *CLDN1*, claudin 1; *SOD1*, superoxide Dismutase 1; *GPXI*, glutathione peroxidase 1; *HO-1*, Heme Oxygenase-1; *METTL3*, methyltransferase like 3; *METTL14*, methyltransferase like 14; *FTO*, fat mass and obesity associated protein; *ALKBH5*, alkB homolog 5; *YTHDF2*, YTH N6-methyladenosine RNA binding protein 2.

**Table S3.** Primer sequence for MeRIP-PCR

| Primers      | Accession no.  | Sequence                   |                            |
|--------------|----------------|----------------------------|----------------------------|
|              |                | F                          | R                          |
| <i>OCNL</i>  | NM_001163647.2 | TCG GGT TCG TTT CCA CTG AG | AGA CTT TAT TGC AGG GGC CC |
| <i>CLDN1</i> | NM_001244539.1 | CCG TGT GGG AAC AAC CAG AA | GCC CTC TCC CCA CAT TCG    |
| <i>ZO-1</i>  | AJ318101.1     | GCC GCC TCC TGA GTT TGA TA | CTA TGG AGC TCA ACA CCC CG |
| <i>HO-1</i>  | NM_001004027.1 | CAG CTG TTT CTG AGC CTC CA | GGA ACG AAG AGT GGC TCC AA |

*OCNL*, occludin; *ZO-1*, zonula occluden-1; *CLDN1*, claudin 1; *HO-1*, Heme Oxygenase-1.
